# Supplementary material for: Predictors of HIV interruption in treatment among people living with HIV in 6 regions in Ghana: a retrospective cohort study
Source: Research Square preprint supplement (doi:10.21203/rs.3.rs-7871647/v1), 2025-11-10
Supplement: Supplementary file 1 [file bc9db84ca79eebc0b567f108.pdf]

### Age group (in years) (p<0.001)

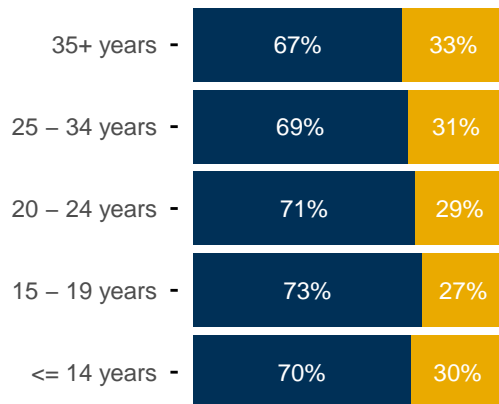

### Marital status (p=0.776)

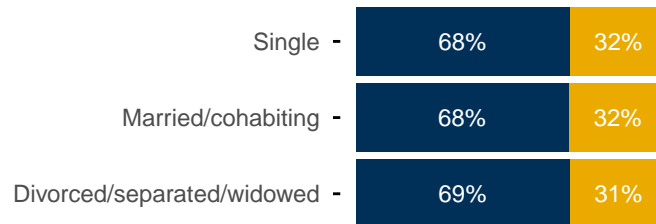

### ART status (p<0.001)

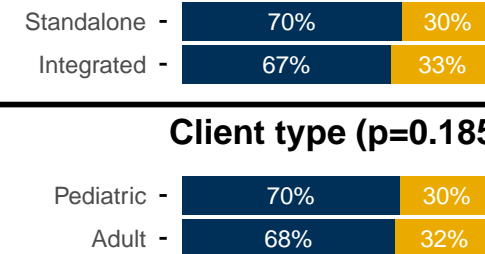

### Client type (p=0.185)

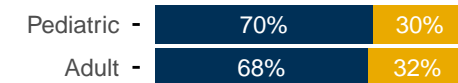

### Time to ART initiation (p<0.001)

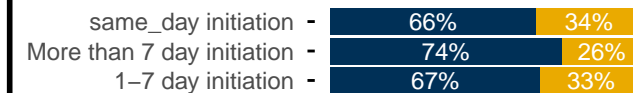

### First Viral load test Time (p<0.001)

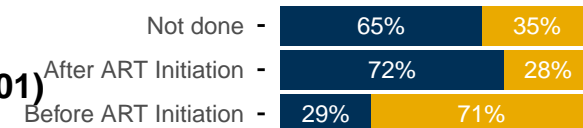

### Provided address at initiation (p=0.001)

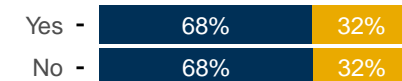

### Facility type (p=0.020)

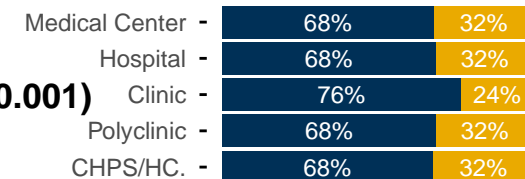

### Facility ownership (p<0.001)

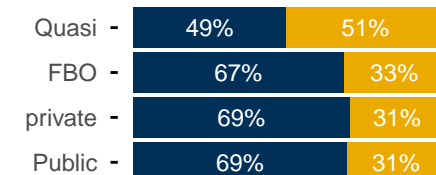

### Sex (p=0.797)

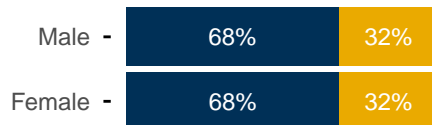

### Highest education (p=0.651)

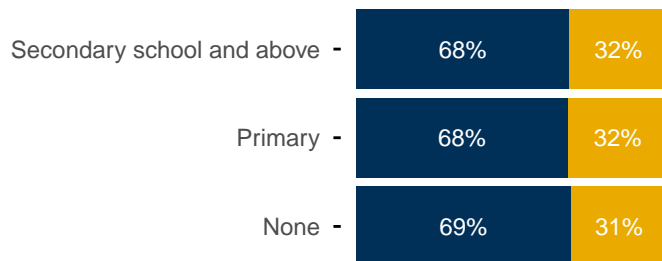

### Occupation (p<0.001)

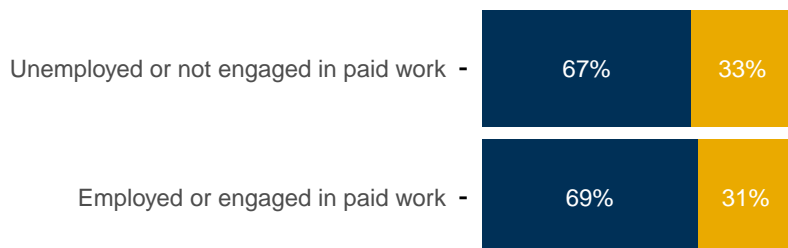

### Region of residency (p<0.001)

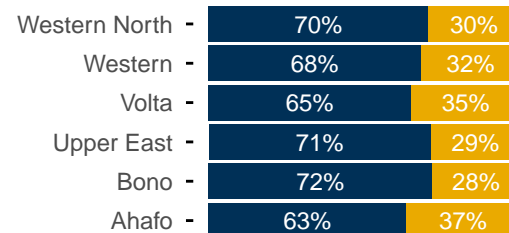

### Rural–Urban residency (p<0.001)

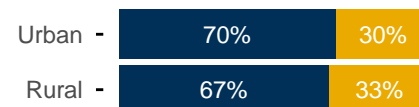

### Smoking history (p=0.948)

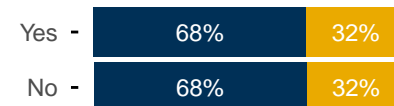

### Provided phone number at initiation (p<0.001)

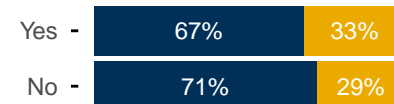

### HIV Type (p=0.822)

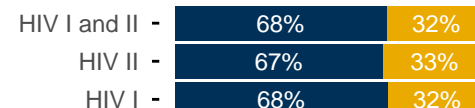

IIT anytime No interruption Treatment interruption
